# Supplementary material for: Feasibility of Bio–Coagulation Dewatering Followed by Bio–Oxidation Process for Treating Swine Wastewater
Source: MDPI journal article supplement (doi:10.3390/ijerph20042990), 2023-02-08
Supplement: s1 [file s1]

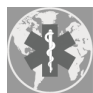

Supplementary Files

# Feasibility of Bio–Coagulation Dewatering Followed by Bio–Oxidation Process for Treating Swine Wastewater

Dejin Zhang <sup>1,†</sup>, Weicheng Han <sup>1,†</sup>, Yujun Zhou <sup>2</sup>, Cheng Yan <sup>1</sup>, Dianzhan Wang <sup>1</sup>, Jianru Liang <sup>1</sup>  
and Lixiang Zhou <sup>1,\*</sup>

<sup>1</sup> Department of Environmental Engineering, College of Resources and Environmental Sciences, Nanjing Agricultural University, Nanjing 210095, China

<sup>2</sup> Jiangsu Key Laboratory of Chemical Pollution Control and Resources Reuse, School of Environmental and Biological Engineering, Nanjing University of Science and Technology, Nanjing 210094, China

\* Correspondence: lxzhou@njau.edu.cn

† These authors contributed equally to this work.

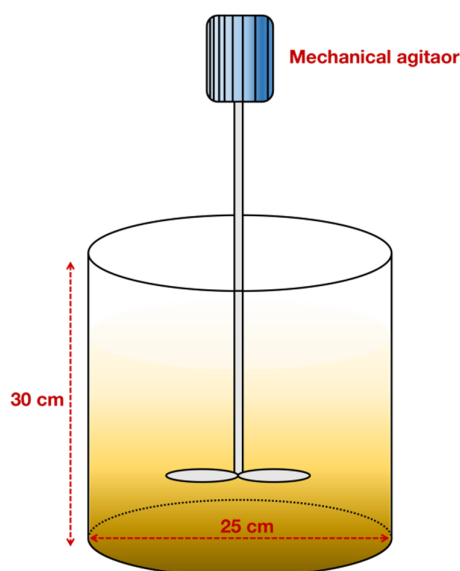

**Figure S1.** Schematic diagram of reactor used in pilot-scale dewatering experiment.
